# Supplementary material for: Adamantane derivatives of sulfonamide molecular crystals: structure, sublimation thermodynamic characteristics, molecular packing, and hydrogen bond networks
Source: Royal Society of Chemistry journal article supplement (doi:10.1039/c4ce02076f), 2014-11-19
Supplement: c4ce02076f1.pdf [file c4ce02076f1.pdf]

## ELECTRONIC SUPPLEMENTARY INFORMATION

### **Adamantane Derivatives of Sulfonamide Molecular Crystals: Structure, Sublimation Thermodynamic Characteristics, Molecular Packing, Hydrogen Bonds Networks**

German L. Perlovich<sup>\*,†,‡</sup>, Alex M. Ryzhakov<sup>†,‡</sup>, Valery V. Tkachev<sup>‡,§</sup>, Alexey N. Proshin<sup>‡</sup>

<sup>†</sup>Krestov's Institute of Solution Chemistry, Russian Academy of Sciences, 153045 Ivanovo, Russia;

<sup>‡</sup>Institute of Physiologically Active Compounds, Russian Academy of Sciences, 142432, Chernogolovka, Russia;

<sup>§</sup>Laboratory of Structural Chemistry, Institute of Problems of Chemical Physics, Russian Academy of Sciences, 142432, Chernogolovka, Russia;

\* To whom correspondence should be addressed:

Telephone: +7-4932-533784; Fax: +7-4932- 336237; E-mail [glp@isc-ras.ru](mailto:glp@isc-ras.ru)

| CONTENT:     | Page  |
|--------------|-------|
| Table 1 ESI  | S2    |
| Table 2 ESI  | S3-S4 |
| Figure 1 ESI | S5    |
| Figure 2 ESI | S6    |
| Figure 3 ESI | S7    |
| Figure 4 ESI | S8    |
| Figure 5 ESI | S9    |
| Figure 6 ESI | S10   |
| Figure 7 ESI | S11   |
| Figure 8 ESI | S12   |
| Figure 9 ESI | S13   |

**Table 1ESI.** Temperature Dependencies of Saturation Vapor Pressure of the Compounds Studied

| <b>1<sup>a</sup></b> |                       | <b>2<sup>b</sup></b> |                       | <b>3<sup>c</sup></b> |                       | <b>4<sup>d</sup></b> |                       | <b>6<sup>e</sup></b> |                       | <b>7<sup>f</sup></b> |                       |
|----------------------|-----------------------|----------------------|-----------------------|----------------------|-----------------------|----------------------|-----------------------|----------------------|-----------------------|----------------------|-----------------------|
| t [°C]               | P [Pa]                |
| 93.2                 | 2.58·10 <sup>-2</sup> | 90.3                 | 1.60·10 <sup>-2</sup> | 114.3                | 4.74·10 <sup>-2</sup> | 105.5                | 1.10·10 <sup>-2</sup> | 90.5                 | 1.87·10 <sup>-2</sup> | 102.0                | 4.18·10 <sup>-2</sup> |
| 94.5                 | 3.04·10 <sup>-2</sup> | 94.4                 | 2.40·10 <sup>-2</sup> | 116.4                | 5.67·10 <sup>-2</sup> | 108.0                | 1.50·10 <sup>-2</sup> | 94.0                 | 2.75·10 <sup>-2</sup> | 105.0                | 5.16·10 <sup>-2</sup> |
| 95.9                 | 3.50·10 <sup>-2</sup> | 98.4                 | 4.00·10 <sup>-2</sup> | 118.6                | 7.81·10 <sup>-2</sup> | 113.0                | 2.40·10 <sup>-2</sup> | 96.2                 | 3.60·10 <sup>-2</sup> | 106.5                | 6.19·10 <sup>-2</sup> |
| 97.2                 | 3.93·10 <sup>-2</sup> | 101.5                | 5.40·10 <sup>-2</sup> | 121.5                | 1.09·10 <sup>-1</sup> | 117.0                | 3.30·10 <sup>-2</sup> | 98.0                 | 4.23·10 <sup>-2</sup> | 110.0                | 8.13·10 <sup>-2</sup> |
| 98.6                 | 4.75·10 <sup>-2</sup> | 104.3                | 6.60·10 <sup>-2</sup> | 123.1                | 1.26·10 <sup>-1</sup> | 120.0                | 5.20·10 <sup>-2</sup> | 100.0                | 4.98·10 <sup>-2</sup> | 111.0                | 9.70·10 <sup>-2</sup> |
| 101.4                | 6.08·10 <sup>-2</sup> | 107.5                | 8.70·10 <sup>-2</sup> | 124.8                | 1.59·10 <sup>-1</sup> | 126.0                | 9.00·10 <sup>-2</sup> | 102.5                | 6.11·10 <sup>-2</sup> | 112.0                | 1.03·10 <sup>-1</sup> |
| 102.8                | 7.32·10 <sup>-2</sup> | 111.5                | 1.34·10 <sup>-1</sup> | 127.1                | 2.04·10 <sup>-1</sup> | 128.0                | 1.07·10 <sup>-1</sup> | 105.0                | 7.73·10 <sup>-2</sup> | 115.5                | 1.45·10 <sup>-1</sup> |
| 104.2                | 8.38·10 <sup>-2</sup> | 115.5                | 1.96·10 <sup>-1</sup> | 128.2                | 2.35·10 <sup>-1</sup> | 131.5                | 1.22·10 <sup>-1</sup> | 108.0                | 1.02·10 <sup>-1</sup> | 118.0                | 1.63·10 <sup>-1</sup> |
| 105.6                | 9.06·10 <sup>-2</sup> | 119.5                | 3.13·10 <sup>-1</sup> | 129.4                | 2.47·10 <sup>-1</sup> | 136.0                | 1.89·10 <sup>-1</sup> | 110.0                | 1.37·10 <sup>-1</sup> | 121.0                | 2.26·10 <sup>-1</sup> |
| 107.1                | 1.06·10 <sup>-1</sup> | 124.0                | 4.18·10 <sup>-1</sup> | 132.4                | 3.50·10 <sup>-1</sup> | 138.0                | 2.35·10 <sup>-1</sup> | 112.0                | 1.54·10 <sup>-1</sup> | 121.5                | 2.41·10 <sup>-1</sup> |
| 108.5                | 1.27·10 <sup>-1</sup> | 128.0                | 5.98·10 <sup>-1</sup> | 133.9                | 4.11·10 <sup>-1</sup> | 143.0                | 3.64·10 <sup>-1</sup> | 114.0                | 2.01·10 <sup>-1</sup> | 124.0                | 2.71·10 <sup>-1</sup> |
| 110.0                | 1.51·10 <sup>-1</sup> | 132.5                | 8.85·10 <sup>-1</sup> | 135.6                | 5.17·10 <sup>-1</sup> | 146.0                | 5.18·10 <sup>-1</sup> | 116.0                | 2.38·10 <sup>-1</sup> | 126.0                | 3.45·10 <sup>-1</sup> |
| 111.5                | 1.73·10 <sup>-1</sup> |                      |                       | 137.8                | 6.77·10 <sup>-1</sup> | 147.5                | 5.61·10 <sup>-1</sup> | 118.3                | 2.84·10 <sup>-1</sup> | 128.0                | 3.76·10 <sup>-1</sup> |
| 113.0                | 1.94·10 <sup>-1</sup> |                      |                       | 139.9                | 7.63·10 <sup>-1</sup> | 153.0                | 7.70·10 <sup>-1</sup> |                      |                       |                      |                       |
| 114.4                | 2.27·10 <sup>-1</sup> |                      |                       | 142.3                | 1.01                  | 155.0                | 9.89·10 <sup>-1</sup> |                      |                       |                      |                       |
| 116.0                | 2.47·10 <sup>-1</sup> |                      |                       | 144.6                | 1.34                  | 162.0                | 15.310 <sup>-1</sup>  |                      |                       |                      |                       |
| 117.5                | 2.97·10 <sup>-1</sup> |                      |                       |                      |                       |                      |                       |                      |                       |                      |                       |
| 119.0                | 3.44·10 <sup>-1</sup> |                      |                       |                      |                       |                      |                       |                      |                       |                      |                       |
| 120.6                | 4.02·10 <sup>-1</sup> |                      |                       |                      |                       |                      |                       |                      |                       |                      |                       |

$$^a \ln(P[\text{Pa}]) = (35.5 \pm 0.3) - (14322 \pm 98)/T; \sigma = 2.5 \cdot 10^{-2}; r = 0.9997; F = 21370; n=19$$

$$^b \ln(P[\text{Pa}]) = (34.4 \pm 0.4) - (14012 \pm 149)/T; \sigma = 4.5 \cdot 10^{-2}; r = 0.9993; F = 8836; n=12$$

$$^c \ln(P[\text{Pa}]) = (42.9 \pm 0.4) - (17808 \pm 151)/T; \sigma = 3.4 \cdot 10^{-2}; r = 0.9996; F = 13902; n=16$$

$$^d \ln(P[\text{Pa}]) = (33.7 \pm 0.4) - (14449 \pm 171)/T; \sigma = 7.0 \cdot 10^{-2}; r = 0.9989; F = 7149; n=16$$

$$^e \ln(P[\text{Pa}]) = (34.2 \pm 0.5) - (13875 \pm 193)/T; \sigma = 4.17 \cdot 10^{-2}; r = 0.9986; F = 5182; n=13$$

$$^f \ln(P[\text{Pa}]) = (31.7 \pm 0.6) - (13089 \pm 217)/T; \sigma = 4.19 \cdot 10^{-2}; r = 0.9987; F = 3641; n=13$$

**Table 2ESI.** Thermodynamic Characteristics of Sublimation and Fusion Processes of Adamantane Derivatives Selected from Literature

| Compound                            | CAS         | $\Delta G_{sub}^{298}$<br>[kJ·mol <sup>-1</sup> ] | $\Delta H_{sub}^{298}$<br>[kJ·mol <sup>-1</sup> ] | $T_m$<br>[K] | $\Delta H_{fus}^T$<br>[kJ·mol <sup>-1</sup> ] | Method <sup>a</sup> | Ref  |
|-------------------------------------|-------------|---------------------------------------------------|---------------------------------------------------|--------------|-----------------------------------------------|---------------------|------|
| 2,2-di-NO <sub>2</sub> -adamantane  | 88381-75-3  | 38.2                                              | 96.4 ± 1.4                                        | 491.2 ± 0.2  | 5.1 ± 0.2                                     | Transpiration       | [1]  |
| Adamantan-2-one (phase I)           | 700-58-3    | 27.2                                              | 66.3 ± 0.8                                        | 557.6 ± 0.2  | 11.8 ± 0.2                                    | K-E                 | [2]  |
| 1-NO <sub>2</sub> -Adamantane       | 7575-82-8   | 29.5                                              | 63.6 ± 1.0                                        | 432.2 ± 0.2  | 4.2 ± 0.4                                     | Transpiration       | [1]  |
| 2-NO <sub>2</sub> -Adamantane       | 54564-31-7  | 36.1                                              | 58 ± 2.3                                          | 441.7 ± 0.5  | 4.2 ± 0.2                                     | Transpiration       | [1]  |
| Adamantane                          | 281-23-2    | 21.4 ± 0.4                                        | 59.1 ± 0.2                                        | 534.3 ± 0.1  | 14.0 ± 0.3                                    | SM                  | [3]  |
| 2-CN-2-NO <sub>2</sub> -Adamantane  | 128478-71-7 | 26.9                                              | 70.0 ± 1.9                                        | 462.2        | -                                             | Transpiration       | [1]  |
| 1-CN-Adamantane                     | 23074-42-2  | 30.9                                              | 67.2 ± 0.8                                        | 459 ± 1      | -                                             | K-E                 | [4]  |
| 1-Me-Adamantane                     | 768-91-2    | -                                                 | 67.8 ± 1.3                                        | 377.2        | -                                             | BG                  | [5]  |
| 2-Me-Adamantane                     | 700-56-1    | -                                                 | 68.2 ± 1.2                                        | 418.2        | -                                             | BG                  | [5]  |
| 1-Adamantyl methyl ketone           | 1660-04-4   | 27.4                                              | 84.2 ± 0.6                                        | 328 ± 1      | -                                             | K-E                 | [6]  |
| 2,2-di-Me-Adamantane                | 19740-34-2  | -                                                 | 73.6 ± 1.3                                        | 422.2        | -                                             | BG                  | [5]  |
| 1,3-di-Me-Adamantane                | 702-79-4    | -                                                 | 67.8 ± 1.3                                        | -            | -                                             | Ebulliometry        | [5]  |
| N,N-dimethyl-1-Adamantylcarboxamide | 1502-00-7   | 37.9                                              | 97.5 ± 0.3                                        | 350 ± 1      | -                                             | K-E                 | [7]  |
| 1,3,5-tri-Me-Adamantane             | 707-35-7    | -                                                 | 77.8                                              | 295.15       | -                                             | BG                  | [5]  |
| 1,1-di-Adamantyl ketone             | 38256-01-8  | 53.3                                              | 109.0 ± 1.8                                       | -            | -                                             |                     | [6]  |
| 1-Adamantylfluorodiphenylmethane    | 154393-25-6 | 57.4                                              | 125.9 ± 1.3                                       | 405.2 ± 0.2  | -                                             | Transpiration       | [8]  |
| 2-Cl-Adamantane                     | 7346-41-0   | 24.2                                              | 61.5 ± 0.9                                        | 467.4 ± 0.2  | -                                             | K-E                 | [9]  |
| 1-OH-Adamantane                     | 768-95-6    | 31.9                                              | 85 ± 1                                            | 554 ± 2      | -                                             | K-E                 | [10] |
| 2-OH-2-Me-Adamantane                | 702-98-7    | 31.8                                              | 91.3 ± 0.8                                        | 490 ± 1      | -                                             | K-E                 | [10] |
| 1-Br-Adamantane (I)                 | 768-90-1    | 24.7                                              | 63.2 ± 2.1                                        | 392          | -                                             | K-E                 | [11] |
| 1-Br-Adamantane (II)                | 768-90-1    | 25                                                | 71.6 ± 1.1                                        | -            | -                                             | K-E                 | [11] |
| 1-NH <sub>2</sub> -Adamantane       | 768-94-5    | 22.5                                              | 61.7 ± 0.6                                        | -            | -                                             | Transpiration       | [12] |
| 1-COOH-Adamantane                   | 828-51-3    | -                                                 | 98.7 ± 4.5                                        | 447.2 ± 0.2  | 16.2 ± 0.4                                    | DSC                 | [13] |

<sup>a</sup> K-E – Knudsen-Effusion; SM – Static Manometer; BG - Bourdon gauge;

[1] K. Fritzsche, B. Dogan, H.-D. Beckhaus, and C. Ruechardt, *Thermochim. Acta* 160, 147-159 (1990).

[2] A. B. Bazyleva, A. V. Blokhin, G. J. Kabo, A. G. Kabo, V. M. Sevruk. *Thermochimica Acta* 451 (2006) 65-72.

[3] I. Mokbel, K. Ruzieka, V. Majer, V. Ruzica, M. Ribeiro, J. Jose, and M. Zabransky, *Fluid Phase Equilib.* 169, 191-207 (2000).

[4] J. L. M. Abboud, P. Jimenez, M. V. Roux, C. Turrion, and C. Lopez-Mardomingo, *J. Chem. Thermodyn.* 24, 1299-1304 (1992).

[5] W. V. Steele and I. Watt, *J. Chem. Thermodyn.* 9, 843-849 (1977).

- [6] J.-L. M. Abboud, P. Jimenez, M. V. Roux, C. Turrion, C. Lopez-Mardonigo, and G. Sanz, *J. Chem. Thermodyn.* 24, 217-223 (1992).
- [7] J.-L. M. Abboud, P. Jimenez, M. V. Roux, C. Turrion, C. Lopez-Mardomingo, A. Podosenin, D. W. Rogers, and J. F. Liebman, *J. Phys. Org. Chem.* 8, 15-25 (1995).
- [8] F. Schaffer, H.-D. Beckhaus, H.-J. Rieger, and C. Ruchardt, *Chem. Ber.* 127, 557-563 (1994).
- [9] J.-L. M. Abboud, O. Castan, J. Z. Davalos, P. Jimenez, R. Gomperts, P. Muller, M. V. Roux. *J. Org. Chem.* 2002, 67, 1057-1060.
- [10] M.B. Charapennikau, A.V. Blokhin, G.J. Kabo, V.M. Sevruk, A.P. Krasulin. *Thermochimica Acta* 405 (2003) 85-91.
- [11] A. B. Bazyleva, G. J. Kabo, Y. U. Paulechka, D. H. Zaitsau, A. V. Blokhin, V. M. Sevruk. *Thermochimica Acta* 436 (2005) 56-67.
- [12] A.B. Bazyleva , A.V. Blokhin , A.G. Kabo, G.J. Kabo, V.N. Emel'yanenko, S.P. Verevkin. *Thermodynamic properties of 1-aminoadamantane/ J. Chem. Thermodynamics* 40 (2008) 509–522.
- [13] M. V. Roux, G. Martn-Valcarcel, R. Notario, S.Kini, J. S. Chickos, J. F. Liebman. *The Joining of Measurement and Prediction: The Enthalpy of Formation of 1,4-Cubanedicarboxylic Acid /J. Chem. Eng. Data* 2011, 56, 1220–1228.

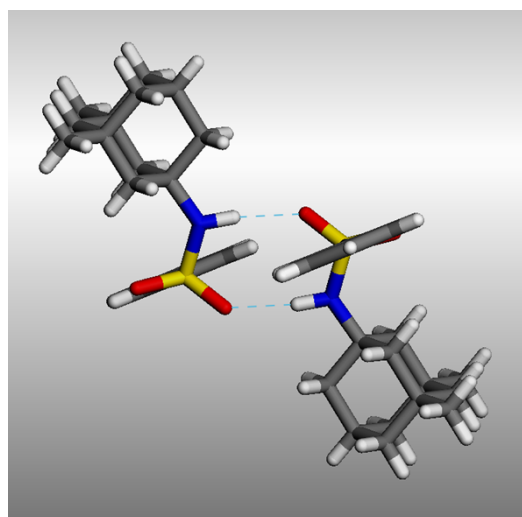

a

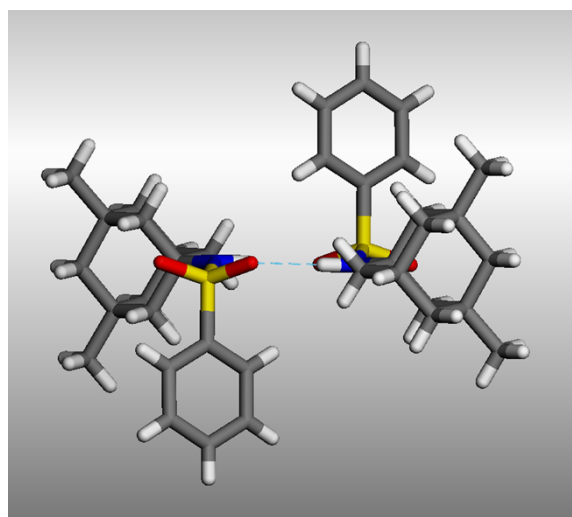

b

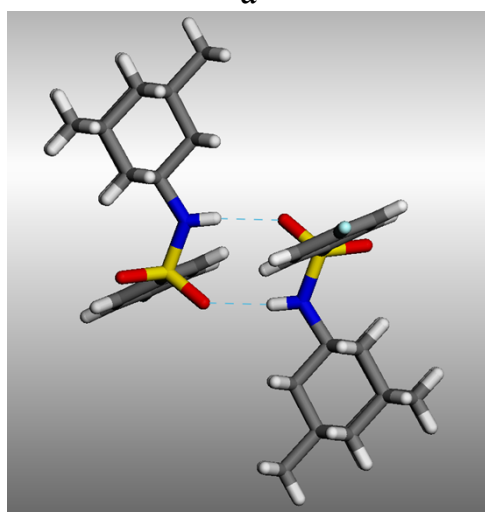

c

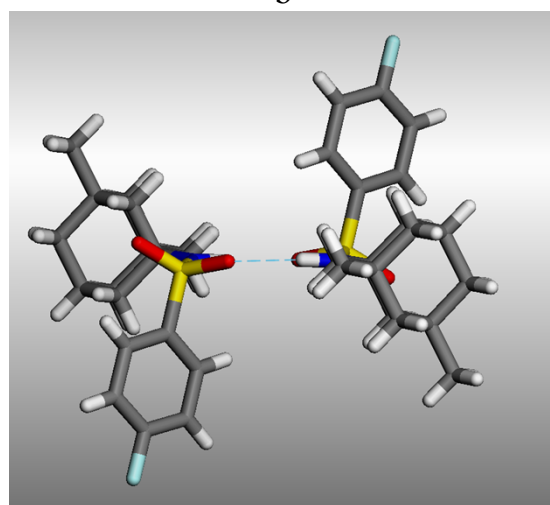

d

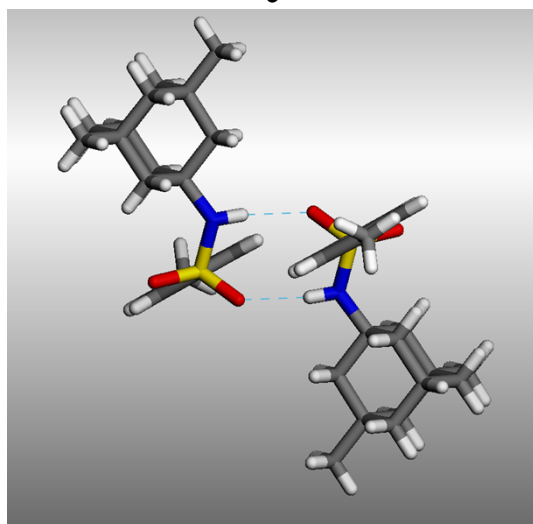

e

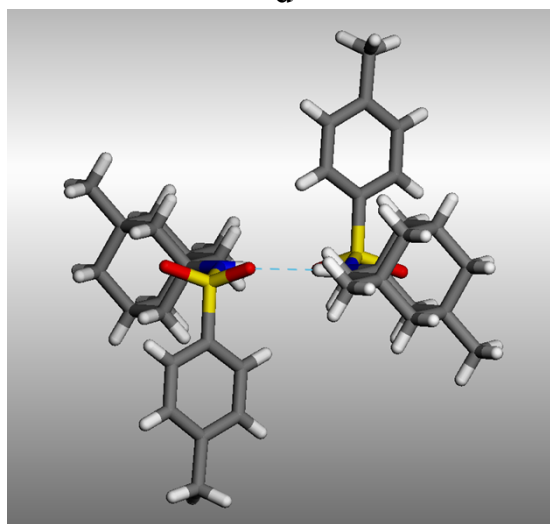

f

**Fig. 1ESI.** Dimers projections in two perpendicular planes for compounds **5** (a, b), **6** (c, d), **7** (e, f).

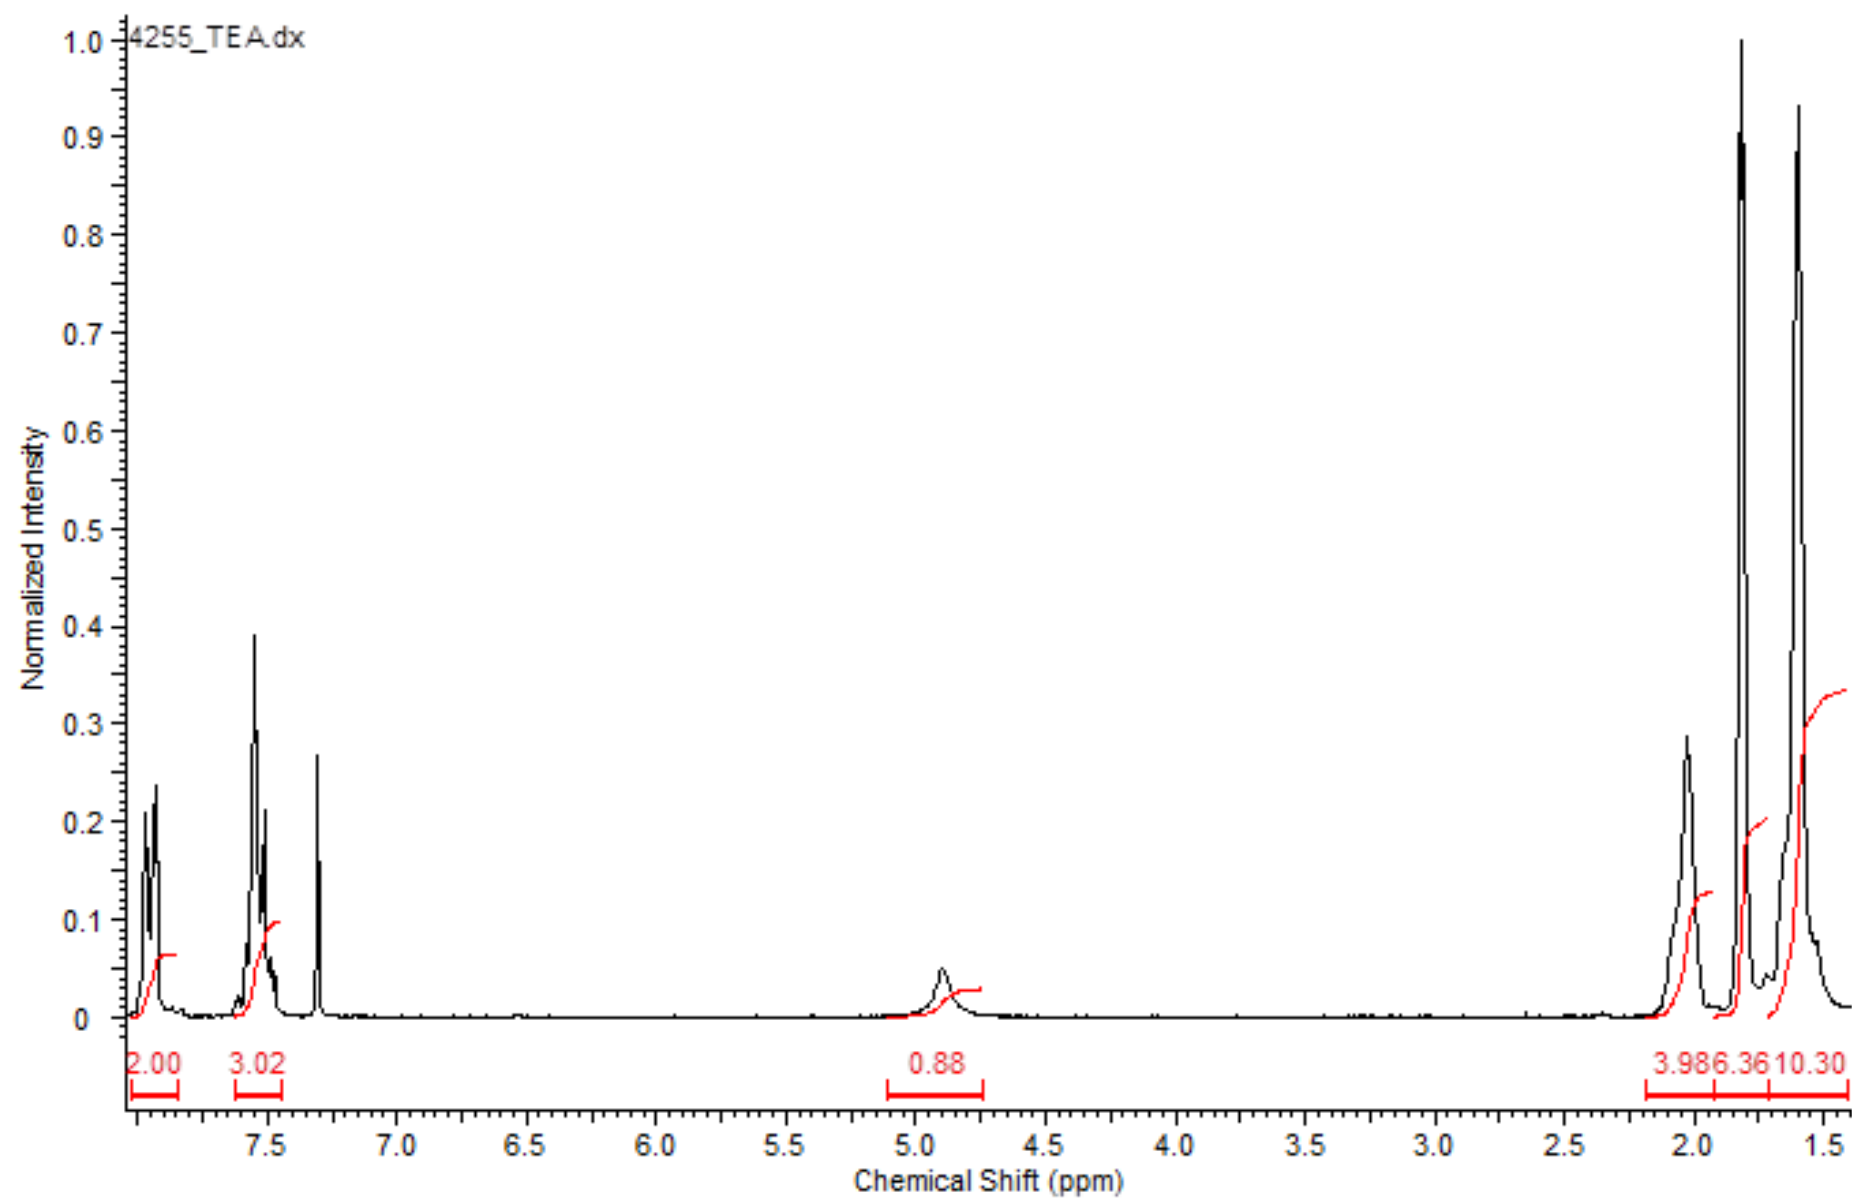

Fig. 2ESI. <sup>1</sup>H NMR spectrum of compound (1) in CDCl<sub>3</sub>

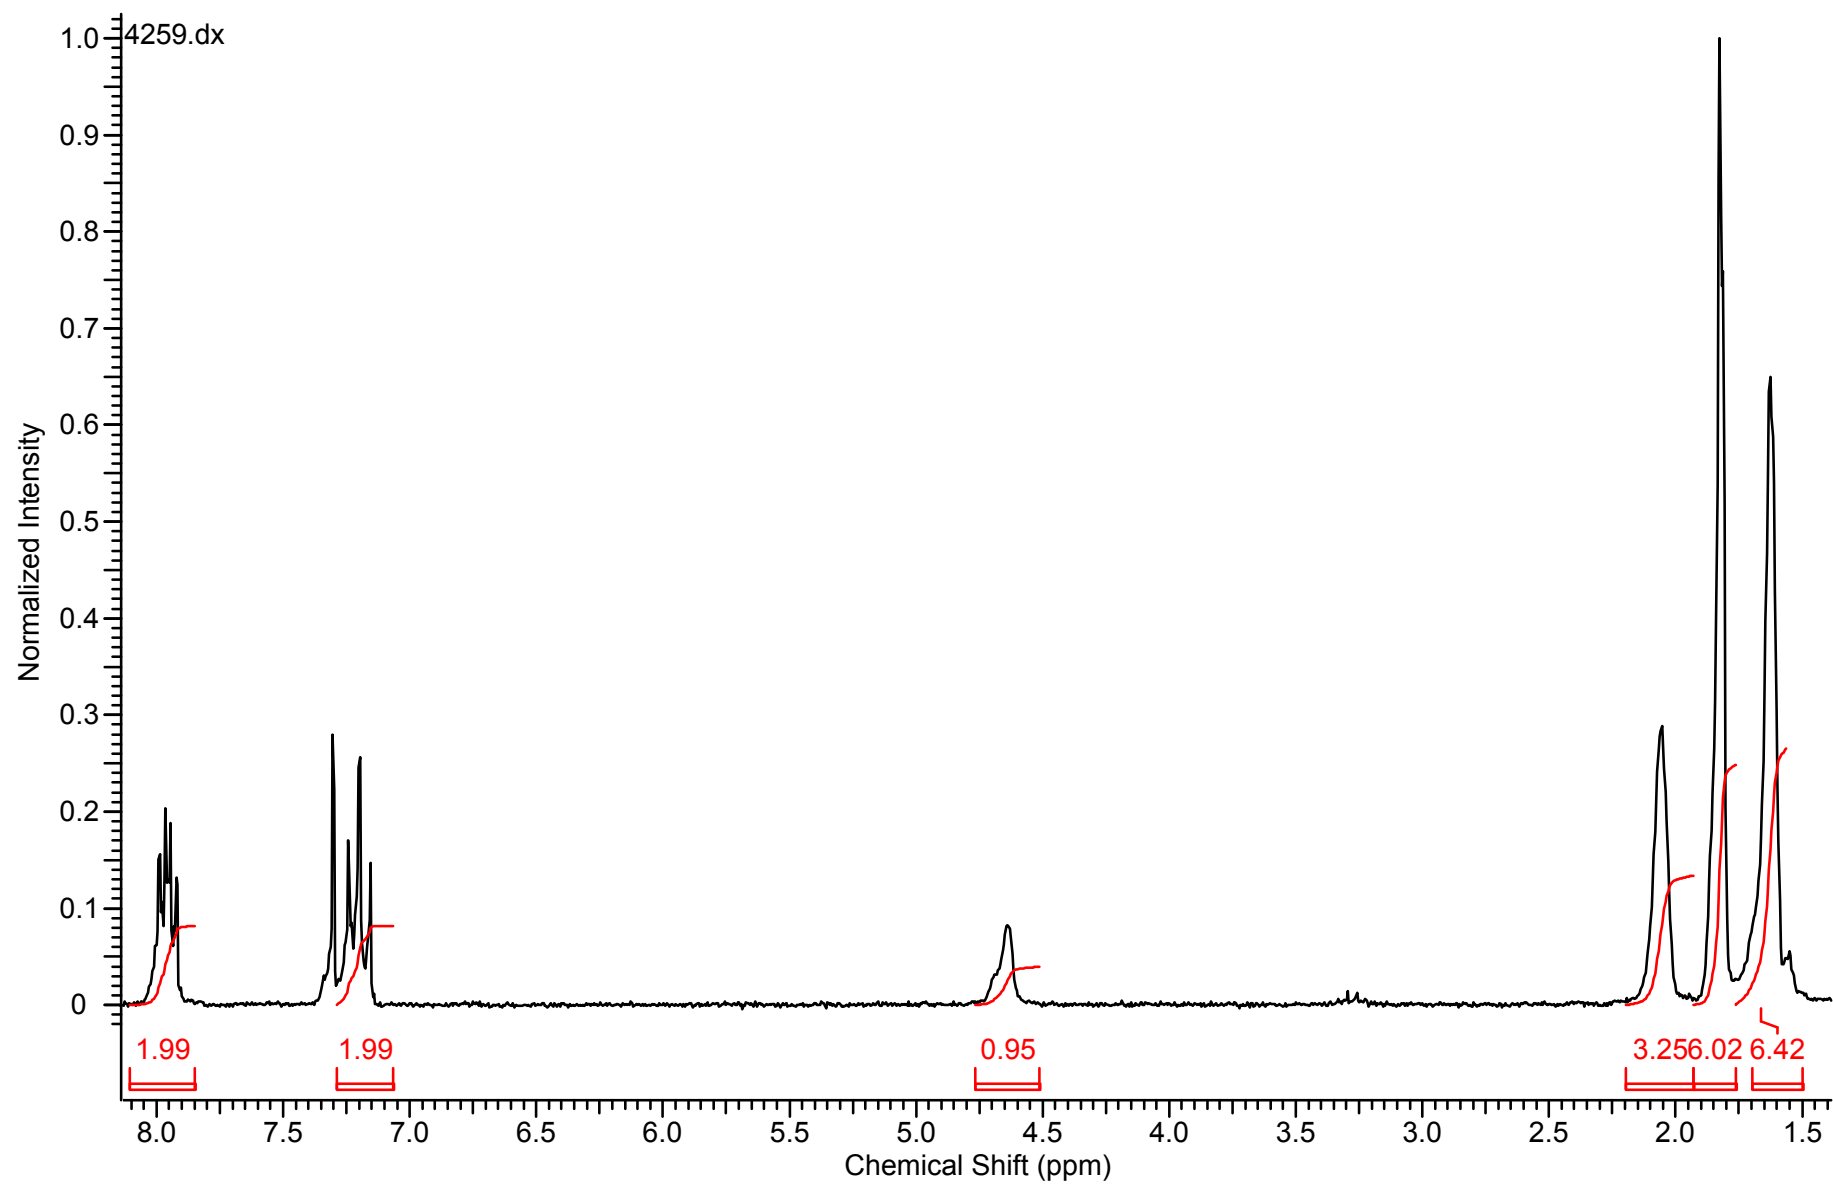

Fig. 3ESI.  $^1\text{H}$  NMR spectrum of compound (2) in  $\text{CDCl}_3$

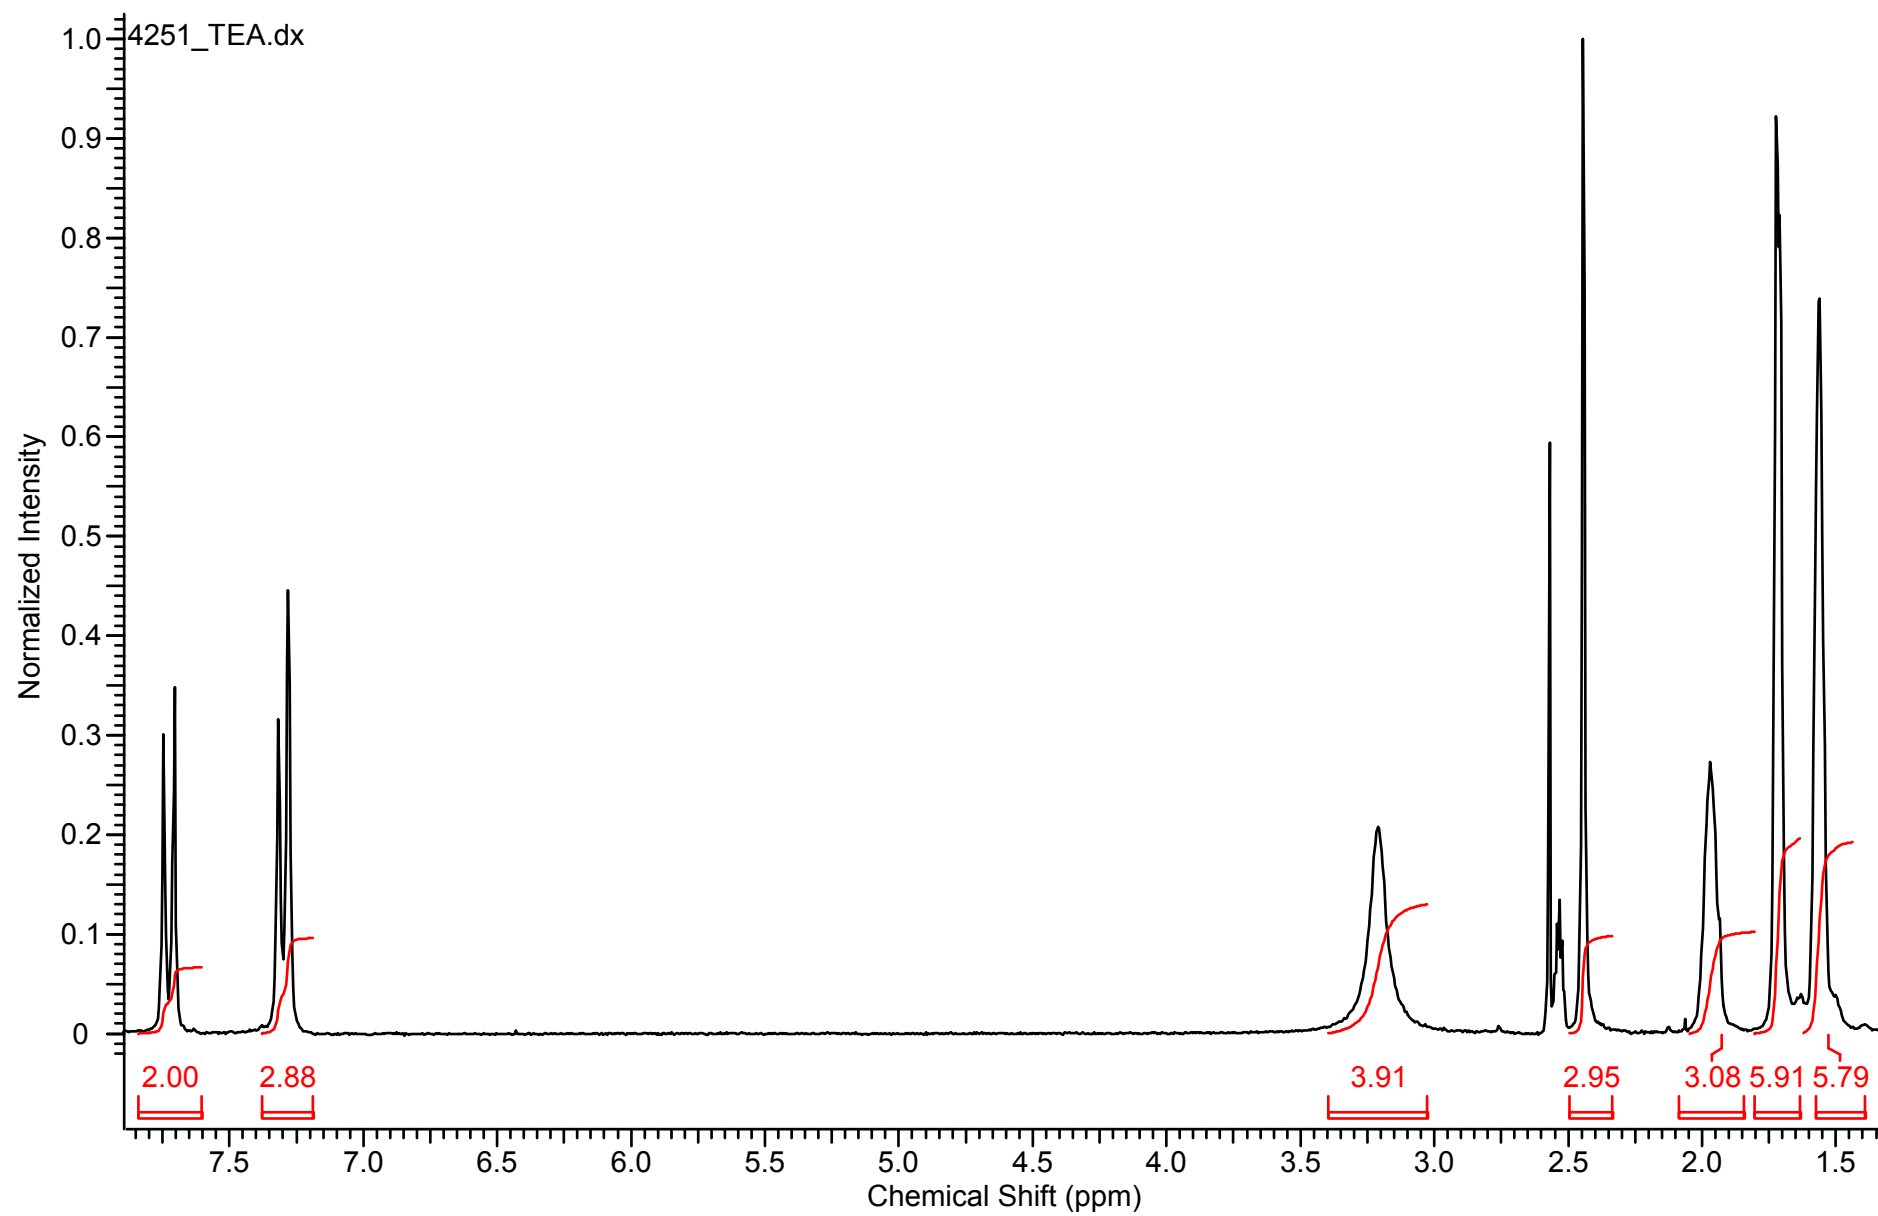

**Fig. 4ESI.**  $^1\text{H}$  NMR spectrum of compound (**3**) in DMSO



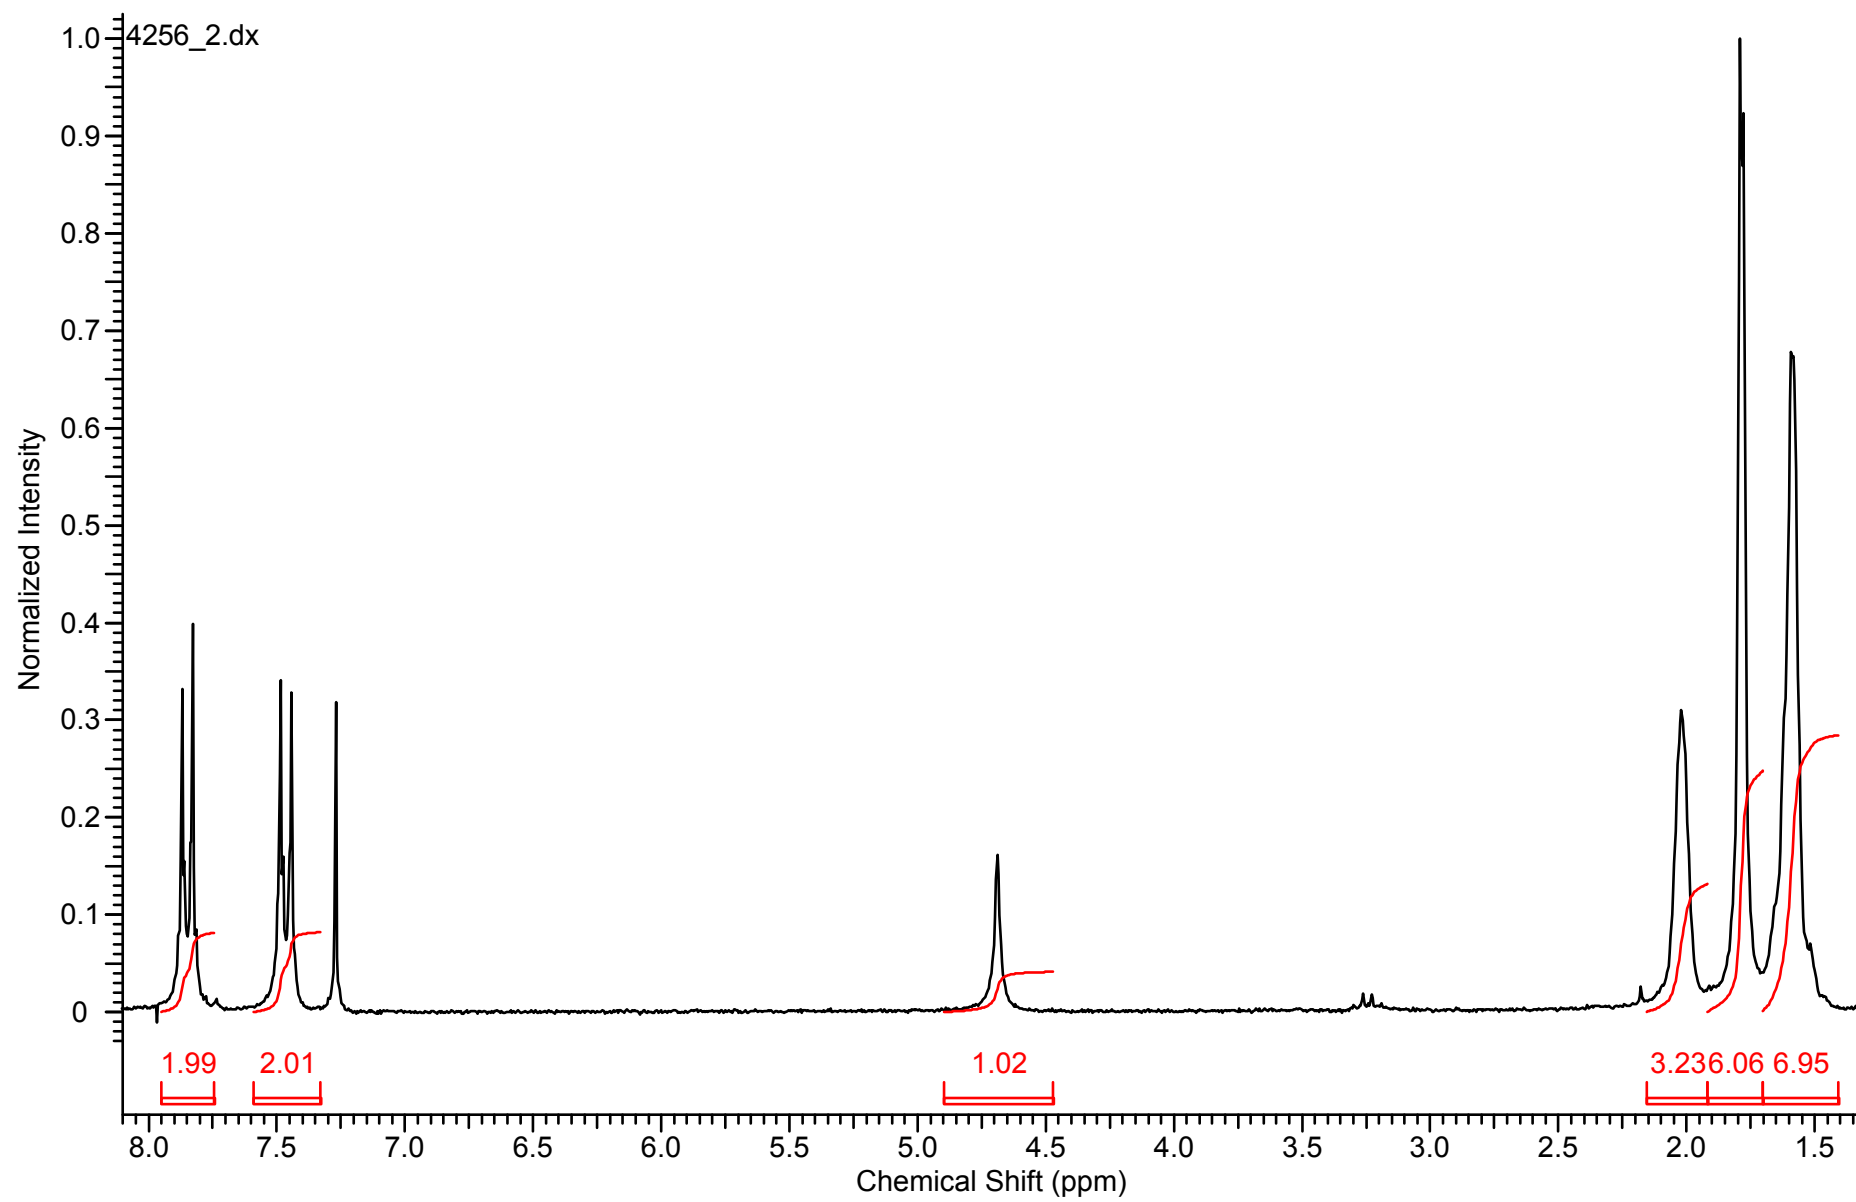

**Fig. 5ESI.**  $^1\text{H}$  NMR spectrum of compound (4) in  $\text{CDCl}_3$

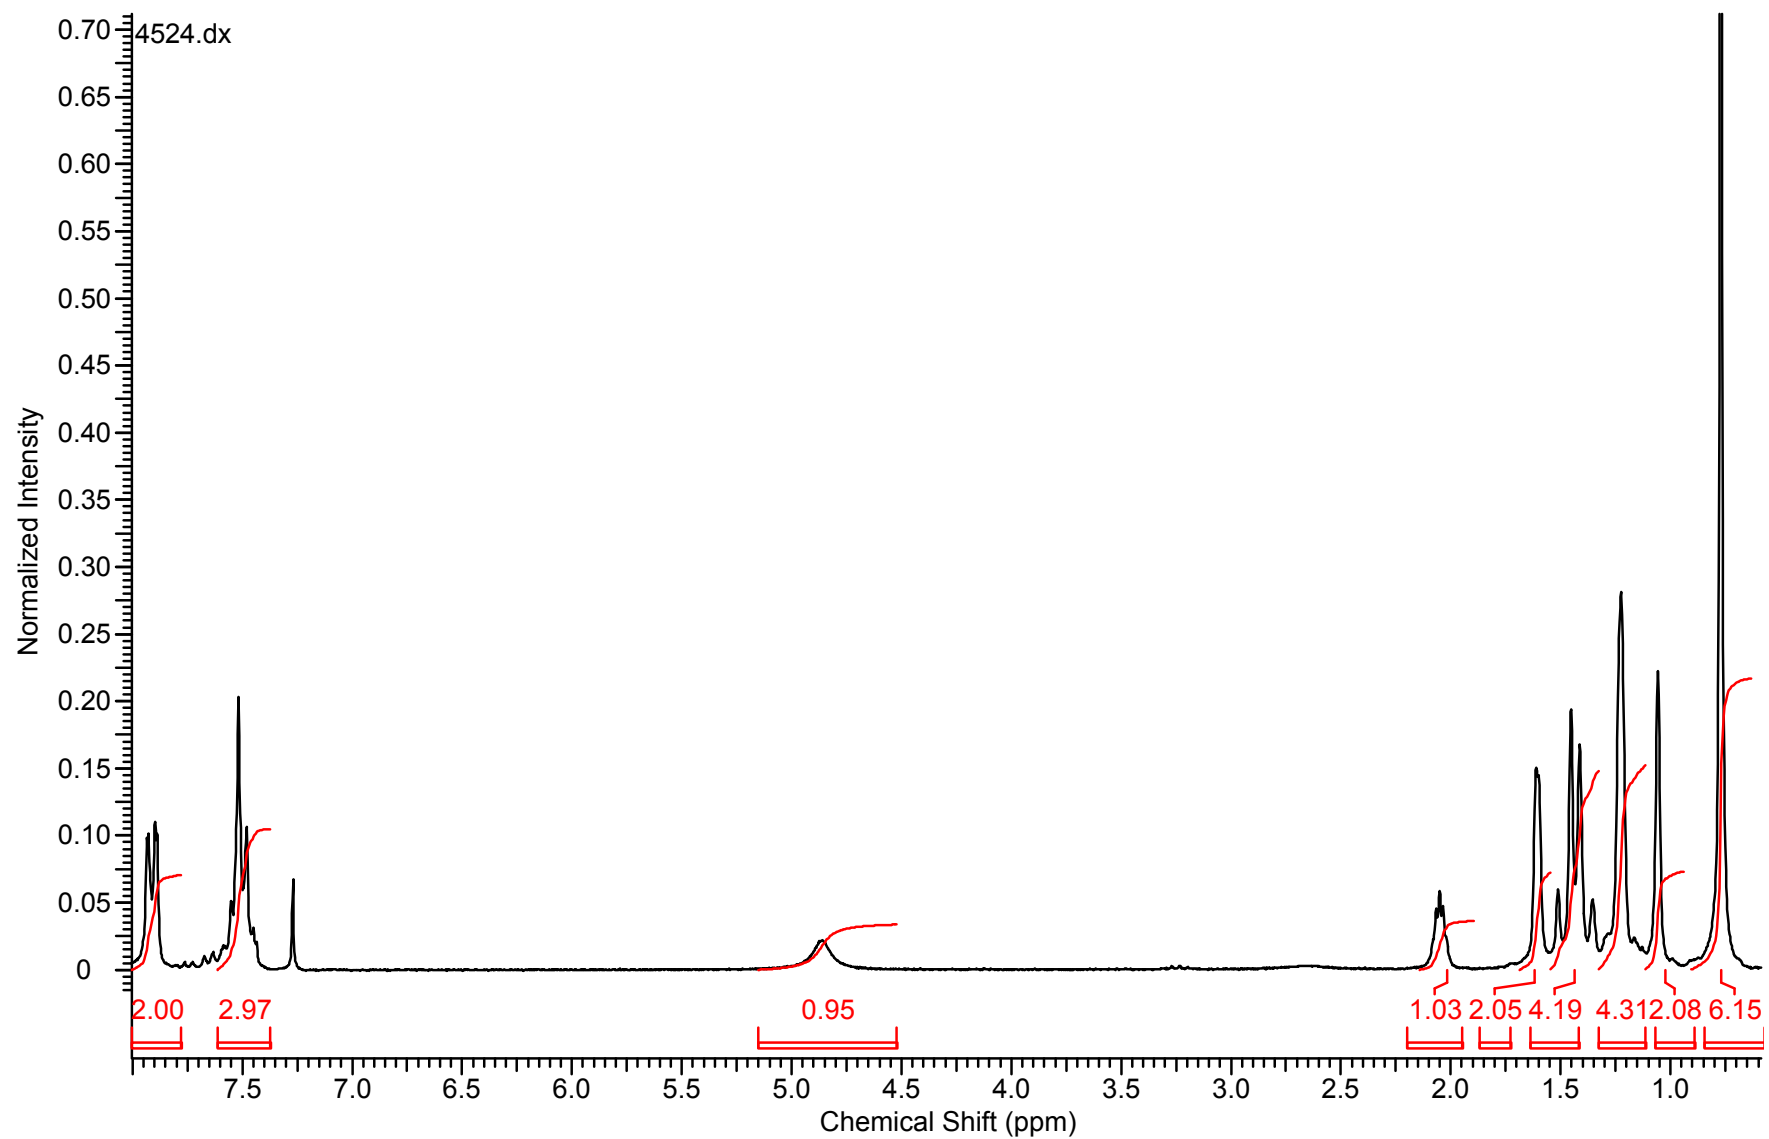

**Fig. 6ESI.**  $^1\text{H}$  NMR spectrum of compound (**5**) in  $\text{CDCl}_3$

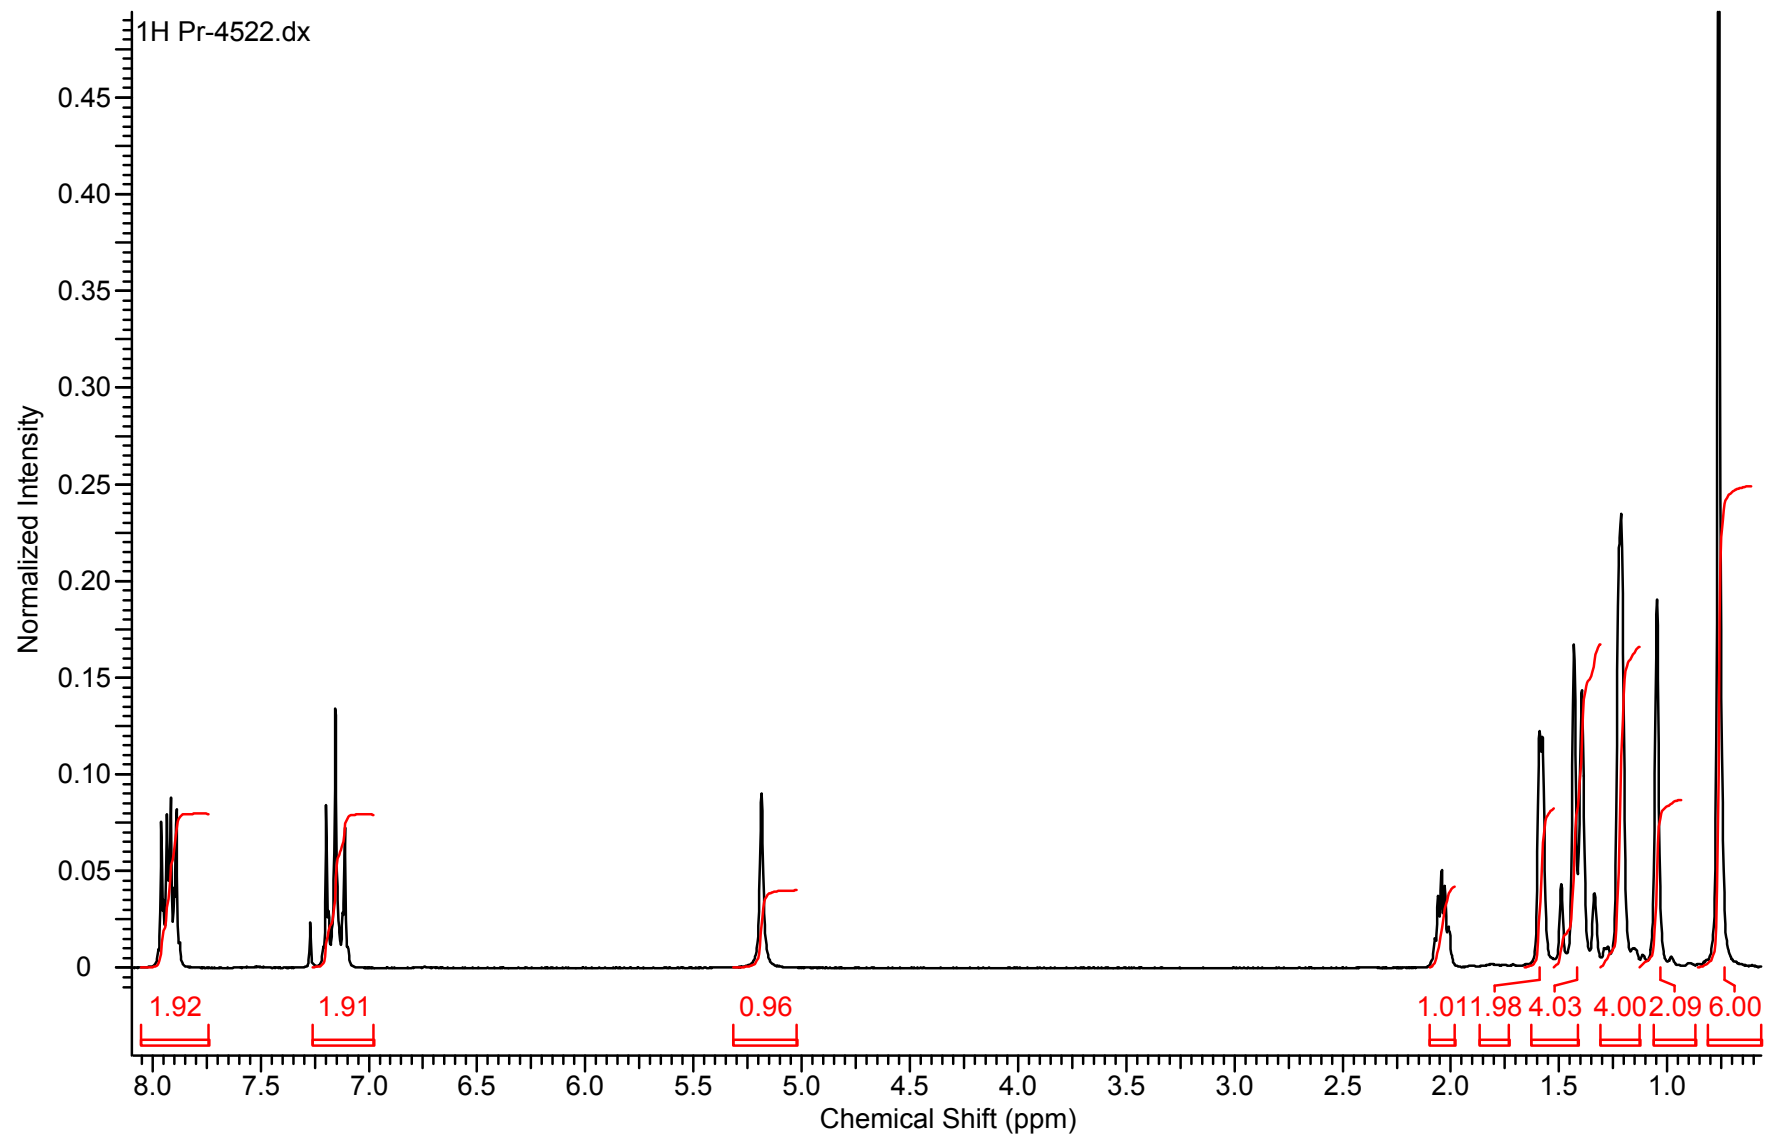

**Fig. 7ESI.**  $^1\text{H}$  NMR spectrum of compound (**6**) in  $\text{CDCl}_3$

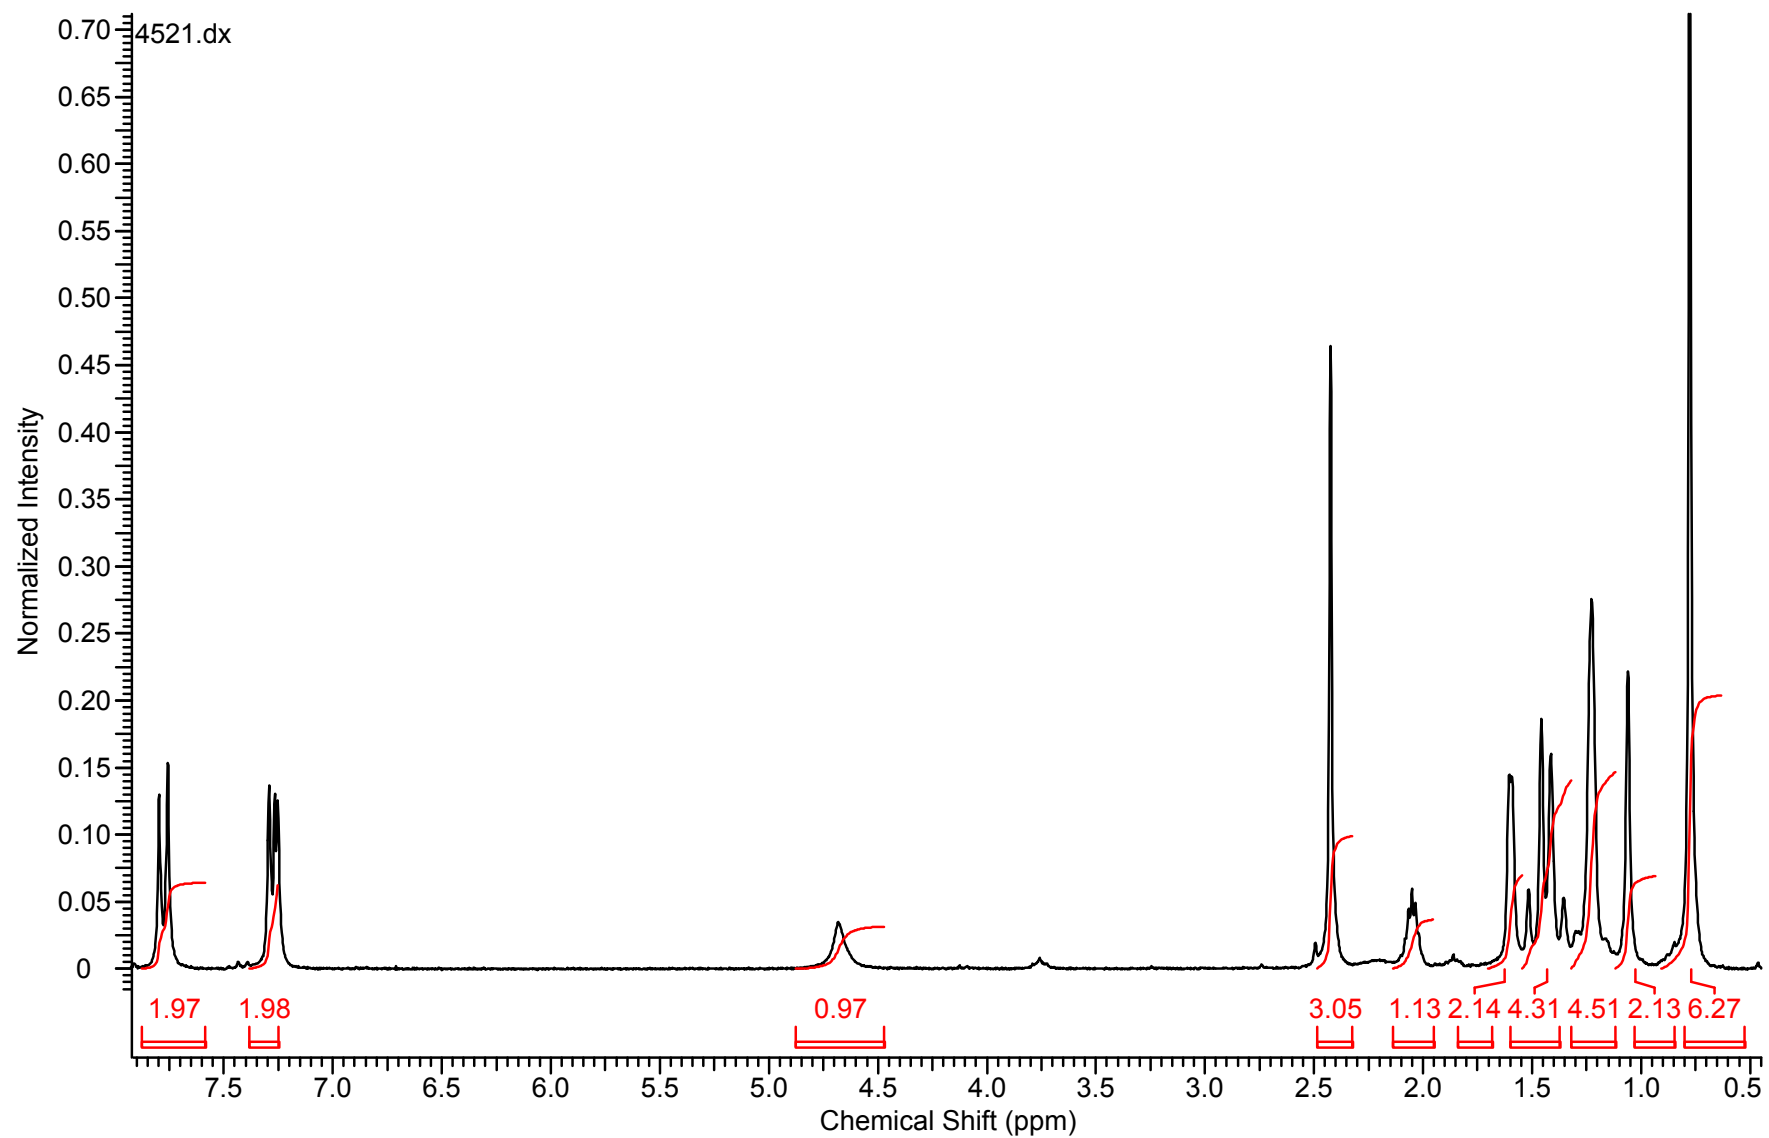

Fig. 8ESI.  $^1\text{H}$  NMR spectrum of compound (7) in  $\text{CDCl}_3$

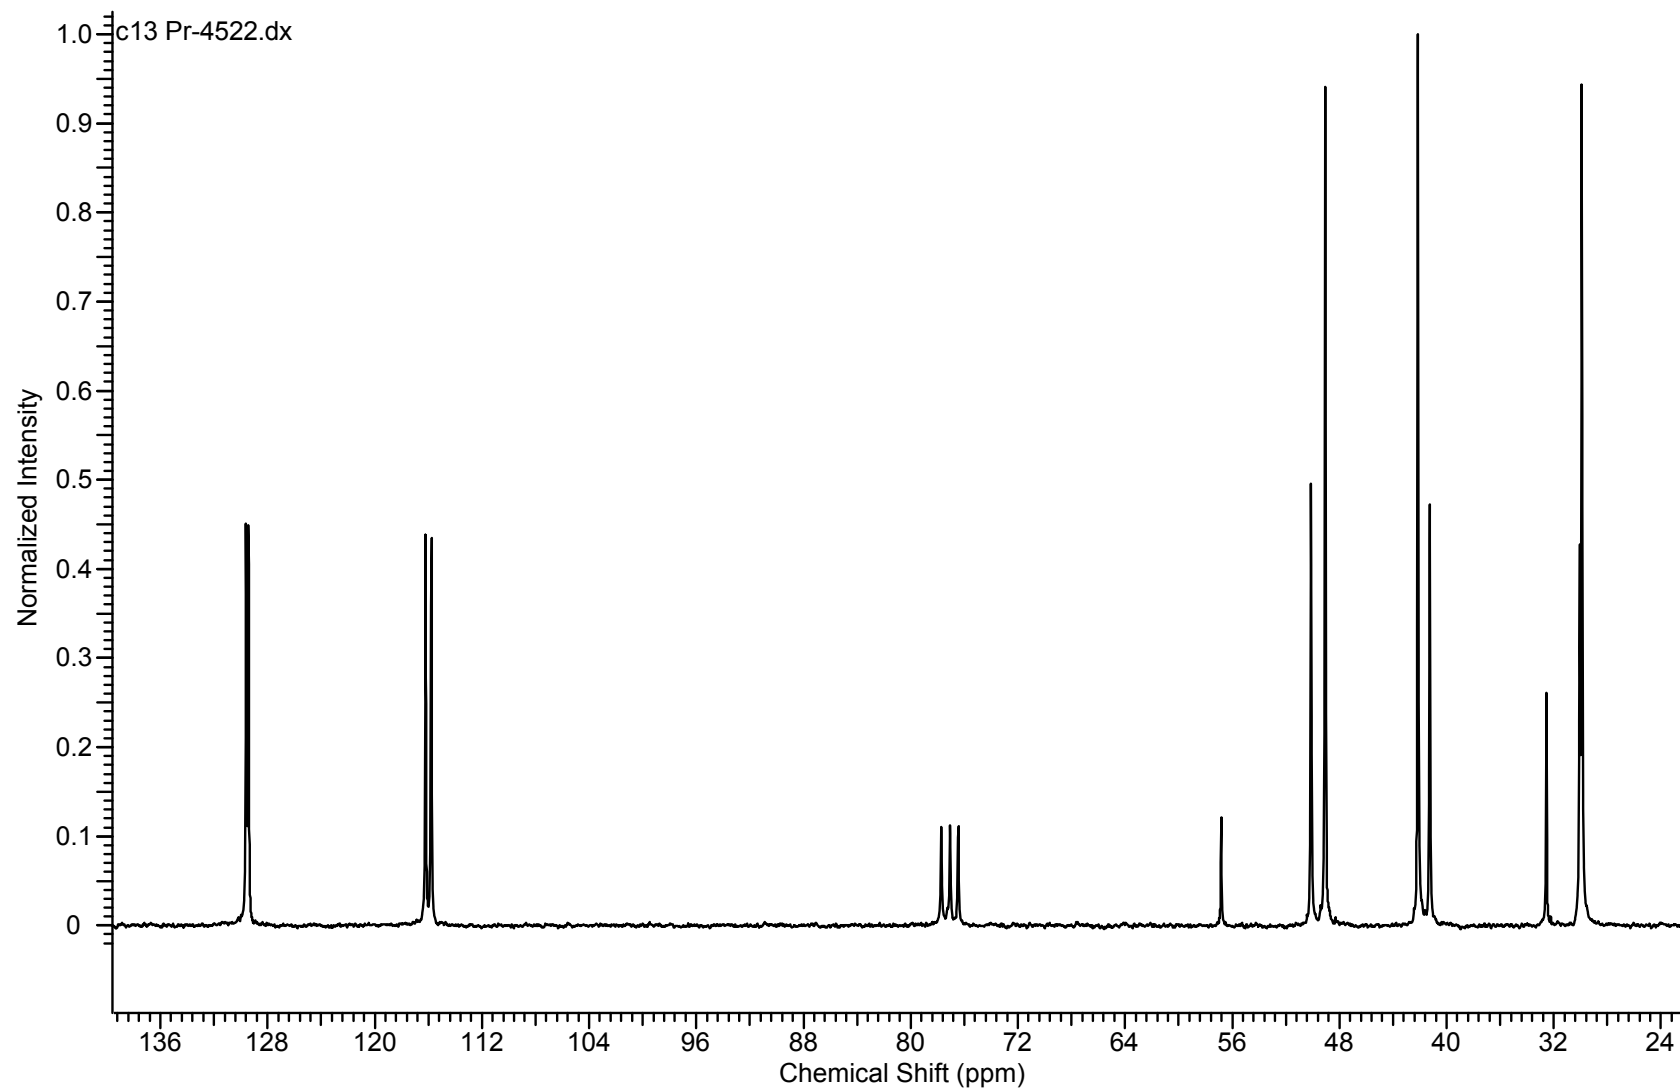

**Fig. 9ESI.**  $^{13}\text{C}$  NMR spectrum of compound (**6**) in  $\text{CDCl}_3$
